# Supplementary material for: Effect of modulating braille dot height on reading regressions
Source: PLoS One. 2019 Apr 17;14(4):e0214799. doi: 10.1371/journal.pone.0214799 (PMC6469841; doi:10.1371/journal.pone.0214799)
Supplement: S1 Data — (XLSX) [file pone.0214799.s001.xlsx]

## Sheet: demographics
subject	age	gender	handedness score	hand used
1	47	M	0.87	Left
2	37	F	1	Right
3	40	F	-0.78	Right
4	22	F	-0.88	Left
5	31	F	0.67	Right
6	26	F	0.79	Right
7	39	M	0.65	Left
8	55	F	0.67	Right
9	70	M	0.8	Left
10	66	F	0.6	Right
11	33	M	0.88	Left
12	51	F	-0.89	Left

## Sheet: data 
subject	trial	height (1 = low, 2 = medium, 3 = high)	reading rate (wpm)	total backwards count	primary regressions count	repeat regressions count	total rereading time (s)	total reading time (s)	mean forward speed (cm/s)	mean backward speed (cm/s)
1	1	2	73.7878	25	16	6	11.2833	131.729	1.97318	2.34243
1	2	1	49.8083	77	43	28	31.0792	189.125	1.70371	1.80352
1	3	3	83.9982	22	19	3	7.94583	110.717	2.00756	2.53514
2	1	3	88.3226	27	23	4	9.3125	105.296	2.2439	3.12266
2	2	1	75.7994	40	36	4	14.4917	127.442	2.08794	2.96043
2	3	2	85.7143	36	30	5	12.0042	113.4	2.26935	3.14098
3	1	2	137.151	11	9	2	2.375	68.6833	3.10371	6.96732
3	2	3	147.05	9	9	0	2.55417	66.1	3.38095	8.19957
3	3	1	113.013	30	24	5	6.34167	82.2917	2.68856	4.58281
4	1	3	107.353	11	9	1	4.10833	89.9833	2.17004	2.33661
4	2	1	89.6541	31	22	5	10.4	108.417	2.39405	2.73328
4	3	2	100.909	18	15	1	8.41667	92.1625	2.37909	2.52437
5	1	1	77.0399	43	28	13	17.775	120.717	2.35158	3.08507
5	2	3	97.2324	26	17	9	17.6625	99.9667	2.8512	3.10353
5	3	2	103.711	23	17	5	9.3875	90.8292	2.8397	4.05552
6	1	2	61.9529	56	29	26	17.2125	155.925	1.68932	2.63109
6	2	3	60.8498	53	34	16	16.8	159.738	1.6735	2.88889
6	3	1	45.7096	83	44	36	33.1583	203.458	1.65865	2.68044
7	1	1	47.2887	89	57	27	31.9333	205.546	1.59258	2.23846
7	2	2	63.242	48	35	8	14.8167	147.054	1.62134	2.21016
7	3	3	56.1424	58	41	13	16.6458	167.787	1.52144	2.53599
8	1	3	101.214	14	10	4	17.95	95.4417	2.81845	4.40436
8	2	1	87.3642	24	18	6	10.5167	111.258	2.5541	4.16853
8	3	2	98.5909	20	12	8	9.77917	94.3292	2.724	4.34187
9	1	1	61.9618	57	34	20	25.6417	156.871	2.13787	2.7289
9	2	3	83.1757	24	17	6	7.3125	113.254	2.00777	2.58057
9	3	2	85.2722	29	25	4	10.4	109.062	2.18458	3.13454
10	1	2	139.522	10	7	3	3.17083	69.6667	3.27396	4.89426
10	2	1	112.972	17	13	3	4.27917	83.3833	2.84891	4.50467
10	3	3	123.451	17	11	6	10.0583	75.3333	3.18286	4.62
11	1	3	62.8465	32	20	8	12.6167	154.662	1.61904	2.3661
11	2	1	46.6848	53	30	13	20.8375	199.208	1.29831	1.1027
11	3	2	66.3025	50	34	13	17.3292	145.696	1.95788	2.09451
12	1	3	99.7765	12	8	3	3.89167	93.2083	2.33698	3.95888
12	2	1	76.3284	33	19	10	12.4667	126.558	2.26082	3.1522
12	3	2	81.444	35	25	9	10.8917	119.346	2.31403	4.18714
